# Supplementary material
Source: publisher site journal article supplement (https://www.dovepress.com/article/279974)
Supplement: Supplementary file 1 [file get_supplementary_file.php]

**Supplementary Figure. 1:** Representative photomicrographs of Lung Adenocarcinoma **(A-D)** and Squamous Cell Carcinoma **(E-I)** by Histology and H&E with IHC. **(A)** Arrow represents Irregular glandular spaces b/w tumor cells in histology, **(B)** Arrowheads represents papillary linked by neoplastic columnar cells in histology, **(C)** The Distribution thyroid transcription factor-1 (TTF-1 nuclear +ve), **(D)** Napsin-A (Naps cytoplasmic +ve), **(E & F)** Arrowheads represents nests of tumor with squamous differentiation in histology, **(G)** The distribution thyroid transcription factor-1 (TTF-1-ve), **(H)** Napsin-A (Naps cytoplasmic -ve), **(I)** P-40 (+ve nclear)


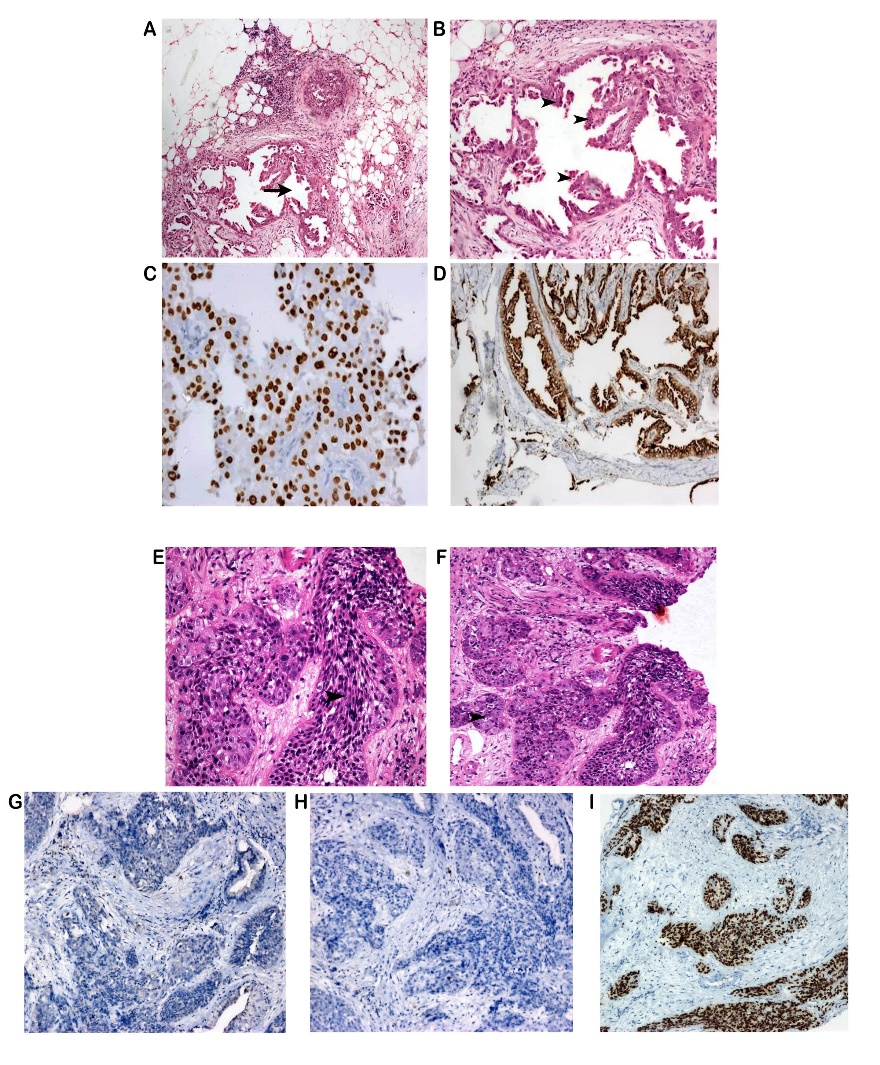


**Supplementary Figure 2:** Reactome pathway with the significant overrepresentation of genes differentially expressed between LUAD and LUSC


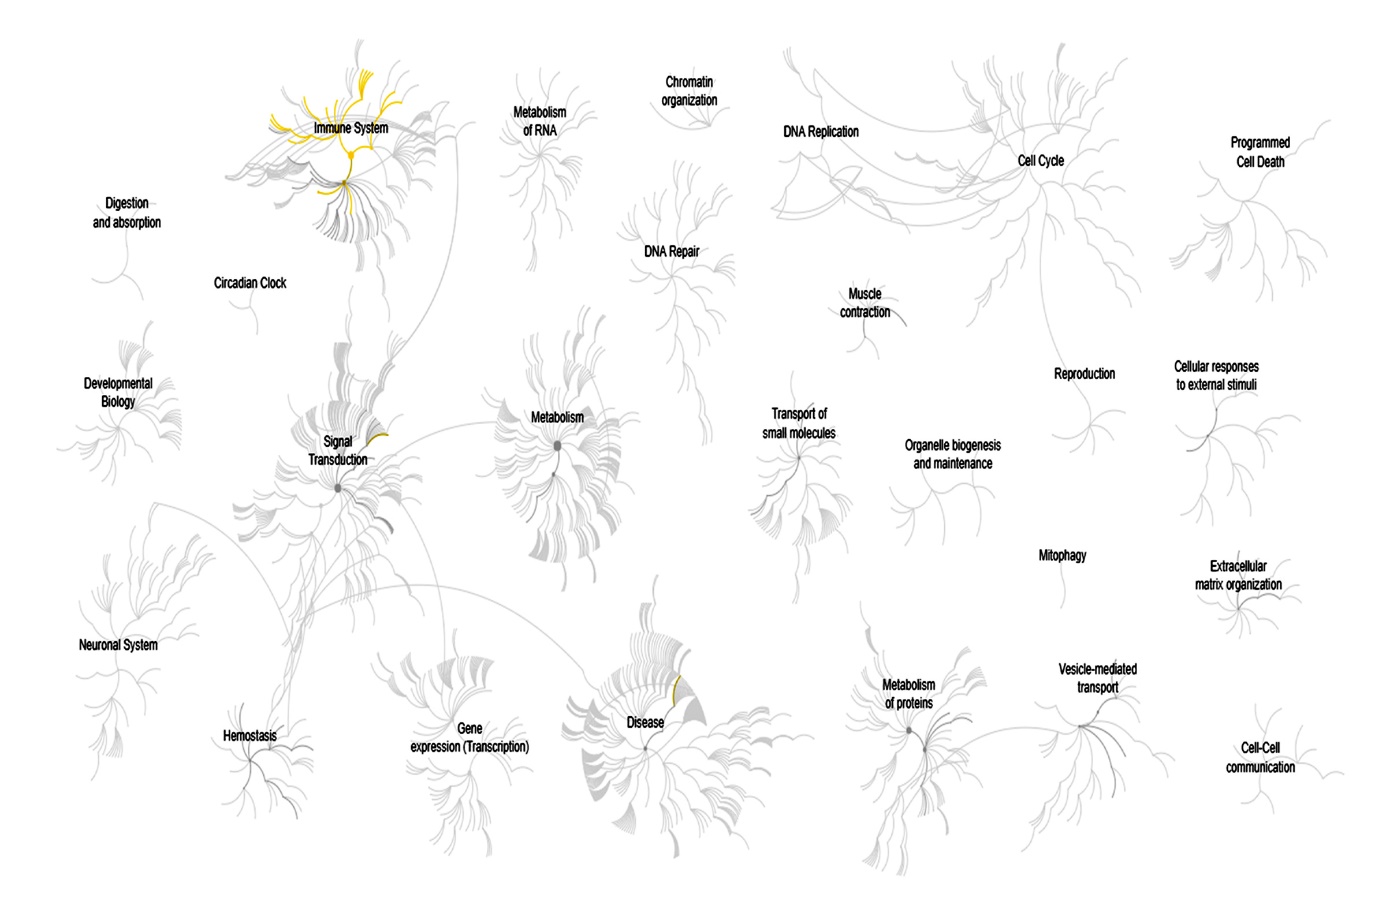


**Supplementary Figure 3:** Hierarchical clustering of genes (Customized panel) in total Stage IIIA-NSCLC blood samples
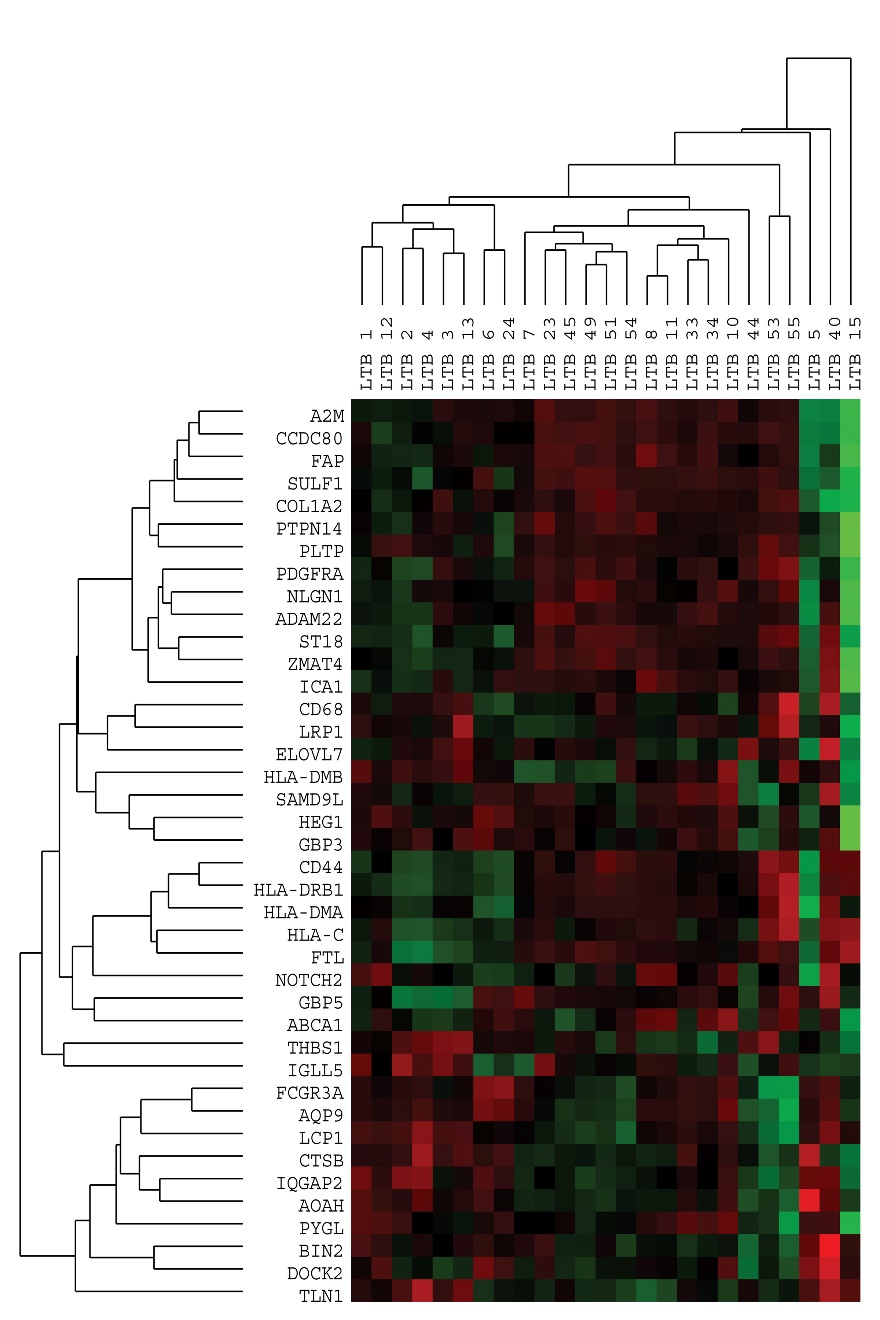


**Supplementary Table 1:** Patient’s detail

| S. No. | Sample ID | Age/Sex | Smoker or Non-Smokers | Histopathologically Characterized | HTA  Array | NanoString | MALDI-TOF | q-RT PCR |
| --- | --- | --- | --- | --- | --- | --- | --- | --- |
| 1 | LT-1 | 55Y/M | Non-Smoker | Adenocarcinoma | Yes | Yes | Yes | Yes |
| 2 | LT-2 | 57Y/M | Smoker | Adenocarcinoma |  | Yes | Yes | Yes |
| 3 | LT-3 | 64Y/M | Non-Smoker | Adenocarcinoma | Yes | Yes | Yes | Yes |
| 4 | LT-4 | 41Y/F | Smoker | Adenocarcinoma |  | Yes | Yes | Yes |
| 5 | LT-5 | 62Y/F | Non-Smoker | Adenocarcinoma | Yes | Yes | Yes | Yes |
| 6 | LT-6 | 34Y/M | Non-Smoker | Adenocarcinoma |  | Yes | Yes | Yes |
| 7 | LT-7 | 62Y/F | Non-Smoker | Squamous Cell Carcinoma | Yes | Yes | Yes | Yes |
| 8 | LT-8 | 55Y/M | Smoker | Squamous Cell Carcinoma | Yes | Yes | Yes | Yes |
| 9 | LT-10 | 72Y/M | Non-Smoker | Adenocarcinoma |  | Yes |  | Yes |
| 10 | LT-11 | 58Y/M | Non-Smoker | Adenocarcinoma | Yes | Yes | Yes | Yes |
| 11 | LT-12 | 42Y/F | Smoker | Squamous Cell Carcinoma | Yes | Yes | Yes | Yes |
| 12 | LT-13 | 67Y/M | Smoker | Adenocarcinoma | Yes | Yes | Yes | Yes |
| 13 | LT-14 | 58Y/M | Smoker | Squamous Cell Carcinoma |  |  | Yes | Yes |
| 14 | LT-15 | 53Y/F | Smoker | Squamous Cell Carcinoma |  | Yes | Yes | Yes |
| 15 | LT-17 | 62Y/M | Smoker | Adenocarcinoma |  |  | Yes | Yes |
| 16 | LT-19 | 48Y/M | Non-Smoker | Squamous Cell Carcinoma |  |  | Yes | Yes |
| 17 | LT-20 | 55Y/M | Non-Smoker | Squamous Cell Carcinoma |  |  | Yes | Yes |
| 18 | LT-21 | 60Y/M | Non-Smoker | Adenocarcinoma |  |  | Yes | Yes |
| 19 | LT-22 | 20Y/F | Non-Smoker | Squamous Cell Carcinoma |  |  | Yes | Yes |
| 20 | LT-23 | 19Y/F | Non-Smoker | Adenocarcinoma |  | Yes | Yes | Yes |
| 21 | LT-24 | 55Y/M | Smoker | Adenocarcinoma |  | Yes | Yes | Yes |
| 22 | LT-25 | 45Y/M | Non-Smoker | Adenocarcinoma |  |  | Yes | Yes |
| 23 | LT-26 | 20Y/M | Non-Smoker | Adenocarcinoma |  |  | Yes | Yes |
| 24 | LT-27 | 55Y/M | Smoker | Adenocarcinoma |  |  | Yes | Yes |
| 25 | LT-28 | 60Y/M | Smoker | Squamous Cell Carcinoma |  |  | Yes | Yes |
| 26 | LT-29 | 13Y/M | Non-Smoker | Adenocarcinoma |  |  | Yes | Yes |
| 27 | LT-30 | 32Y/M | Non-Smoker | Squamous Cell Carcinoma |  |  | Yes | Yes |
| 28 | LT-31 | 55Y/M | Non-Smoker | Squamous Cell Carcinoma |  |  | Yes | Yes |
| 29 | LT-32 | 45Y/M | Non-Smoker | Squamous Cell Carcinoma |  |  | Yes | Yes |
| 30 | LT-33 | 50Y/F | Non-Smoker | Adenocarcinoma | Yes | Yes | Yes | Yes |
| 31 | LT-34 | 65Y/M | Non-Smoker | Squamous Cell Carcinoma | Yes | Yes | Yes | Yes |
| 32 | LT-35 | 65Y/M | Non-Smoker | Adenocarcinoma |  | Yes | Yes | Yes |
| 33 | LT-36 | 55Y/F | Non-Smoker | Squamous Cell Carcinoma |  |  | Yes | Yes |
| 34 | LT-37 | 78Y/F | Non-Smoker | Squamous Cell Carcinoma |  |  | Yes | Yes |
| 35 | LT-38 | 60Y/F | Non-Smoker | Squamous Cell Carcinoma |  |  | Yes | Yes |
| 36 | LT-39 | 50Y/F | Non-Smoker | Squamous Cell Carcinoma |  |  | Yes | Yes |
| 37 | LT-40 | 9Y/M | Non-Smoker | Squamous Cell Carcinoma |  | Yes | Yes | Yes |
| 38 | LT-41 | 55Y/M | Non-Smoker | Squamous Cell Carcinoma |  |  |  | Yes |
| 39 | LT-42 | 70Y/M | Smoker | Squamous Cell Carcinoma |  |  | Yes | Yes |
| 40 | LT-43 | 45Y/M | Non-Smoker | Squamous Cell Carcinoma |  |  | Yes | Yes |
| 41 | LT-44 | 53Y/M | Smoker | Squamous Cell Carcinoma |  | Yes |  | Yes |
| 42 | LT-45 | 72Y/M | Non-Smoker | Squamous Cell Carcinoma |  | Yes |  | Yes |
| 43 | LT49 | 55Y/F | Non-Smoker | Squamous Cell Carcinoma |  | Yes |  | Yes |
| 44 | LT-51 | 60Y/F | Non-Smoker | Squamous Cell Carcinoma |  | Yes |  | Yes |
| 45 | LT-53 | 25y/m | Non-Smoker | Squamous Cell Carcinoma |  | Yes |  | Yes |
| 46 | LT-54 | 48Y/ M | Smoker | Squamous Cell Carcinoma |  | Yes |  | Yes |
| 47 | LT55 | 55Y/ M | Smoker | Adenocarcinoma |  | Yes |  | Yes |

**Supplementary Table 2.** NanoString code set detail for 96 transcripts including 5 housekeeping genes for the NSCLC Stage IIIA.

|  | **Customer Identifier** | **Accession** | **Position** | **HUGO Gene** | **NSID** | **Column** |
| --- | --- | --- | --- | --- | --- | --- |
| 1 | ADM | NM_001124.1 | 1301-1400 | ADM | NM_001124.1:1300 | |
| 2 | AKR1C2 | NM_001135241.2 | 256-355 | AKR1C2 | NM_001135241.2:255 | |
| 3 | HSPB1 | NM_001540.3 | 375-474 | HSPB1 | NM_001540.3:374 | |
| 4 | TPM2 | NM_003289.3 | 892-991 | TPM2 | NM_003289.3:891 | |
| 5 | SERPINE1 | NM_000602.4 | 578-677 | SERPINE1 | NM_000602.4:577 | |
| 6 | HLA-DMB | NM_002118.3 | 21-120 | HLA-DMB | NM_002118.3:20 | |
| 7 | MMP2 | NM_004530.2 | 2361-2460 | MMP2 | NM_004530.2:2360 | |
| 8 | PTPN14 | NM_005401.4 | 3771-3870 | PTPN14 | NM_005401.4:3770 | |
| 9 | NDRG1 | NM_001135242.1 | 2721-2820 | NDRG1 | NM_001135242.1:2720 | |
| 10 | CTSB | NM_147780.2 | 1055-1154 | CTSB | NM_147780.2:1054 | |
| 11 | PLIN2 | NM_001122.3 | 419-518 | PLIN2 | NM_001122.3:418 | |
| 12 | A2M | NM_000014.4 | 1686-1785 | A2M | NM_000014.4:1685 | |
| 13 | LGALS1 | NM_002305.3 | 61-160 | LGALS1 | NM_002305.3:60 | |
| 14 | CXCL8 | NM_000584.2 | 26-125 | CXCL8 | NM_000584.2:25 | |
| 15 | DOCK2 | NM_004946.2 | 2431-2530 | DOCK2 | NM_004946.2:2430 | |
| 16 | COL5A1 | NM_000093.3 | 873-972 | COL5A1 | NM_000093.3:872 | |
| 17 | TPD52L1 | NM_003287.2 | 456-555 | TPD52L1 | NM_003287.2:455 | |
| 18 | BCL2A1 | NM_004049.2 | 81-180 | BCL2A1 | NM_004049.2:80 | |
| 19 | HLA-DRB1 | NM_002124.3 | 748-847 | HLA-DRB1 | NM_002124.3:747 | |
| 20 | FABP5 | NM_001444.1 | 101-200 | FABP5 | NM_001444.1:100 | |
| 21 | FCGR3A | NM_000569.6 | 1645-1744 | FCGR3A | NM_000569.6:1644 | |
| 22 | BCAT1 | NM_001178091.1 | 947-1046 | BCAT1 | NM_001178091.1:946 | |
| 23 | LCP1 | NM_002298.4 | 3196-3295 | LCP1 | NM_002298.4:3195 | |
| 24 | FTL | NM_000146.3 | 86-185 | FTL | NM_000146.3:85 | |
| 25 | MYLK | NM_053032.2 | 711-810 | MYLK | NM_053032.2:710 | |
| 26 | FEZ2 | NM_001042548.1 | 616-715 | FEZ2 | NM_001042548.1:615 | |
| 27 | MYH9 | NM_002473.3 | 3154-3253 | MYH9 | NM_002473.3:3153 | |
| 28 | NOTCH2 | NM_024408.3 | 2843-2942 | NOTCH2 | NM_024408.3:2842 | |
| 29 | DNAJC5B | NM_033105.4 | 265-364 | DNAJC5B | NM_033105.4:264 | |
| 30 | PRKX | NM_005044.1 | 2591-2690 | PRKX | NM_005044.1:2590 | |
| 31 | SNAI2 | NM_003068.3 | 741-840 | SNAI2 | NM_003068.3:740 | |
| 32 | MYC | NM_002467.3 | 1611-1710 | MYC | NM_002467.3:1610 | |
| 33 | HLA-C | NM_002117.4 | 896-995 | HLA-C | NM_002117.4:895 | |
| 34 | ARPC1B | NM_005720.2 | 1117-1216 | ARPC1B | NM_005720.2:1116 | |
| 35 | AOAH | NM_001637.3 | 1304-1403 | AOAH | NM_001637.3:1303 | |
| 36 | GBP3 | NM_018284.2 | 40-139 | GBP3 | NM_018284.2:39 | |
| 37 | FAP | NM_004460.2 | 1491-1590 | FAP | NM_004460.2:1490 | |
| 38 | IGLL5 | NM_001178126.1 | 959-1058 | IGLL5 | NM_001178126.1:958 | |
| 39 | PTHLH | NM_198965.1 | 606-705 | PTHLH | NM_198965.1:605 | |
| 40 | AQP9 | NM_020980.3 | 1503-1602 | AQP9 | NM_020980.3:1502 | |
| 41 | LY75-CD302 | NM_001198759.1 | 5010-5109 | LY75-CD302 | NM_001198759.1:5009 | |
| 42 | LIPA | NM_000235.3 | 1221-1320 | LIPA | NM_000235.3:1220 | |
| 43 | VSNL1 | NM_003385.4 | 931-1030 | VSNL1 | NM_003385.4:930 | |
| 44 | PLTP | NM_006227.2 | 1379-1478 | PLTP | NM_006227.2:1378 | |
| 45 | NPL | NM_001200056.1 | 1296-1395 | NPL | NM_001200056.1:1295 | |
| 46 | CD44 | NM_001001392.1 | 430-529 | CD44 | NM_001001392.1:429 | |
| 47 | CD68 | NM_001251.2 | 1141-1240 | CD68 | NM_001251.2:1140 | |
| 48 | PLN | NM_002667.3 | 213-312 | PLN | NM_002667.3:212 | |
| 49 | CXCL12 | NM_199168.3 | 70-169 | CXCL12 | NM_199168.3:69 | |
| 50 | MXRA5 | NM_015419.3 | 5821-5920 | MXRA5 | NM_015419.3:5820 | |
| 51 | APOL1 | NM_003661.3 | 821-920 | APOL1 | NM_003661.3:820 | |
| 52 | COL14A1 | NM_021110.1 | 1866-1965 | COL14A1 | NM_021110.1:1865 | |
| 53 | SULF1 | NM_001128204.1 | 3005-3104 | SULF1 | NM_001128204.1:3004 | |
| 54 | PDPN | NM_006474.4 | 432-531 | PDPN | NM_006474.4:431 | |
| 55 | TBXAS1 | NM_001130966.2 | 1031-1130 | TBXAS1 | NM_001130966.2:1030 | |
| 56 | CYTH4 | NM_013385.3 | 285-384 | CYTH4 | NM_013385.3:284 | |
| 57 | APOE | NM_000041.2 | 97-196 | APOE | NM_000041.2:96 | |
| 58 | WSB1 | NM_015626.8 | 863-962 | WSB1 | NM_015626.8:862 | |
| 59 | HLA-DMA | NM_006120.3 | 256-355 | HLA-DMA | NM_006120.3:255 | |
| 60 | THBS1 | NM_003246.2 | 3466-3565 | THBS1 | NM_003246.2:3465 | |
| 61 | CCDC80 | NM_199511.1 | 3236-3335 | CCDC80 | NM_199511.1:3235 | |
| 62 | HEG1 | NM_020733.1 | 1891-1990 | HEG1 | NM_020733.1:1890 | |
| 63 | GNB4 | NM_021629.3 | 735-834 | GNB4 | NM_021629.3:734 | |
| 64 | PDGFRA | NM_006206.3 | 1926-2025 | PDGFRA | NM_006206.3:1925 | |
| 65 | SLC1A3 | NM_004172.4 | 559-658 | SLC1A3 | NM_004172.4:558 | |
| 66 | IQGAP2 | NM_006633.2 | 1636-1735 | IQGAP2 | NM_006633.2:1635 | |
| 67 | SP110 | NM_004510.3 | 266-365 | SP110 | NM_004510.3:265 | |
| 68 | FN1 | NM_212482.1 | 1777-1876 | FN1 | NM_212482.1:1776 | |
| 69 | GBP5 | NM_052942.3 | 1956-2055 | GBP5 | NM_052942.3:1955 | |
| 70 | DNAJB4 | NM_007034.3 | 950-1049 | DNAJB4 | NM_007034.3:949 | |
| 71 | LBH | NM_030915.3 | 2341-2440 | LBH | NM_030915.3:2340 | |
| 72 | RNASET2 | NM_003730.4 | 905-1004 | RNASET2 | NM_003730.4:904 | |
| 73 | PSAP | NM_001042465.1 | 2276-2375 | PSAP | NM_001042465.1:2275 | |
| 74 | MYOF | NM_013451.3 | 4871-4970 | MYOF | NM_013451.3:4870 | |
| 75 | LRP1 | NM_002332.2 | 4241-4340 | LRP1 | NM_002332.2:4240 | |
| 76 | BIN2 | NM_016293.2 | 856-955 | BIN2 | NM_016293.2:855 | |
| 77 | EGLN3 | NM_022073.3 | 801-900 | EGLN3 | NM_022073.3:800 | |
| 78 | PYGL | NM_002863.3 | 556-655 | PYGL | NM_002863.3:555 | |
| 79 | COL1A2 | NM_000089.3 | 2636-2735 | COL1A2 | NM_000089.3:2635 | |
| 80 | HGF | NM_000601.4 | 551-650 | HGF | NM_000601.4:550 | |
| 81 | SAMD9L | NM_152703.2 | 1175-1274 | SAMD9L | NM_152703.2:1174 | |
| 82 | TLN1 | NM_006289.3 | 1461-1560 | TLN1 | NM_006289.3:1460 | |
| 83 | ABCA1 | NM_005502.3 | 4049-4148 | ABCA1 | NM_005502.3:4048 | |
| 84 | PGD | NM_002631.2 | 1473-1572 | PGD | NM_002631.2:1472 | |
| 85 | NOVA1 | NM_006489.2 | 627-726 | NOVA1 | NM_006489.2:626 | |
| 86 | ADAM22 | NM_021723.3 | 2291-2390 | ADAM22 | NM_021723.3:2290 | |
| 87 | NLGN1 | NM_014932.2 | 496-595 | NLGN1 | NM_014932.2:495 | |
| 88 | ICA1 | NM_004968.3 | 1623-1722 | ICA1 | NM_004968.3:1622 | |
| 89 | ZMAT4 | NM_001135731.1 | 361-460 | ZMAT4 | NM_001135731.1:360 | |
| 90 | LMO3 | NM_001001395.2 | 491-590 | LMO3 | NM_001001395.2:490 | |
| 91 | ELOVL7 | NM_024930.1 | 426-525 | ELOVL7 | NM_024930.1:425 | |
| 92 | PON3 | NM_000940.2 | 244-343 | PON3 | NM_000940.2:243 | |
| 93 | ST18 | NM_014682.2 | 1296-1395 | ST18 | NM_014682.2:1295 | |
| 94 | ACTB_NM_001101 | NM_001101.2 | 1011-1110 | ACTB | NM_001101.2:1010 | |
| 95 | GAPDH_NM_002046 | NM_002046.3 | 36-135 | GAPDH | NM_002046.3:35 | |
| 96 | RPL19_all | NM_000981.3 | 316-415 | RPL19 | NM_000981.3:315 | |
| 97 | TBP_NM_003194 | NM_003194.3 | 26-125 | TBP | NM_003194.3:25 | |
| 98 | TUBB_all | NM_178014.2 | 1956-2055 | TUBB | NM_178014.2:1955 | |

**ISOFORM COVERAGE**

| Customer Name | HUGO Gene | Probe NSID |
| --- | --- | --- |
| A2M | A2M | NM_000014.4:1685 |
| ABCA1 | ABCA1 | NM_005502.3:4048 |
| ACTB_NM_001101 | ACTB | NM_001101.2:1010 |
| ADAM22 | ADAM22 | NM_021723.3:2290 |
| ADM | ADM | NM_001124.1:1300 |
| AKR1C2 | AKR1C2 | NM_001135241.2:255 |
| AOAH | AOAH | NM_001637.3:1303 |
| APOE | APOE | NM_000041.2:96 |
| APOL1 | APOL1 | NM_003661.3:820 |
| AQP9 | AQP9 | NM_020980.3:1502 |
| ARPC1B | ARPC1B | NM_005720.2:1116 |
| BCAT1 | BCAT1 | NM_001178091.1:946 |
| BCL2A1 | BCL2A1 | NM_004049.2:80 |
| BIN2 | BIN2 | NM_016293.2:855 |
| CCDC80 | CCDC80 | NM_199511.1:3235 |
| CD44 | CD44 | NM_001001392.1:429 |
| CD68 | CD68 | NM_001251.2:1140 |
| COL14A1 | COL14A1 | NM_021110.1:1865 |
| COL1A2 | COL1A2 | NM_000089.3:2635 |
| COL5A1 | COL5A1 | NM_000093.3:872 |
| CTSB | CTSB | NM_147780.2:1054 |
| CXCL12 | CXCL12 | NM_199168.3:69 |
| CXCL8 | CXCL8 | NM_000584.2:25 |
| CYTH4 | CYTH4 | NM_013385.3:284 |
| DNAJB4 | DNAJB4 | NM_007034.3:949 |
| DNAJC5B | DNAJC5B | NM_033105.4:264 |
| DOCK2 | DOCK2 | NM_004946.2:2430 |
| EGLN3 | EGLN3 | NM_022073.3:800 |
| ELOVL7 | ELOVL7 | NM_024930.1:425 |
| FABP5 | FABP5 | NM_001444.1:100 |
| FAP | FAP | NM_004460.2:1490 |
| FCGR3A | FCGR3A | NM_000569.6:1644 |
| FEZ2 | FEZ2 | NM_001042548.1:615 |
| FN1 | FN1 | NM_212482.1:1776 |
| FTL | FTL | NM_000146.3:85 |
| GAPDH_NM_002046 | GAPDH | NM_002046.3:35 |
| GBP3 | GBP3 | NM_018284.2:39 |
| GBP5 | GBP5 | NM_052942.3:1955 |
| GNB4 | GNB4 | NM_021629.3:734 |
| HEG1 | HEG1 | NM_020733.1:1890 |
| HGF | HGF | NM_000601.4:550 |
| HLA-C | HLA-C | NM_002117.4:895 |
| HLA-DMA | HLA-DMA | NM_006120.3:255 |
| HLA-DMB | HLA-DMB | NM_002118.3:20 |
| HLA-DRB1 | HLA-DRB1 | NM_002124.3:747 |
| HSPB1 | HSPB1 | NM_001540.3:374 |
| ICA1 | ICA1 | NM_004968.3:1622 |
| IGLL5 | IGLL5 | NM_001178126.1:958 |
| IQGAP2 | IQGAP2 | NM_006633.2:1635 |
| LBH | LBH | NM_030915.3:2340 |
| LCP1 | LCP1 | NM_002298.4:3195 |
| LGALS1 | LGALS1 | NM_002305.3:60 |
| LIPA | LIPA | NM_000235.3:1220 |
| LMO3 | LMO3 | NM_001001395.2:490 |
| LRP1 | LRP1 | NM_002332.2:4240 |
| LY75-CD302 | LY75-CD302 | NM_001198759.1:5009 |
| MMP2 | MMP2 | NM_004530.2:2360 |
| MXRA5 | MXRA5 | NM_015419.3:5820 |
| MYC | MYC | NM_002467.3:1610 |
| MYH9 | MYH9 | NM_002473.3:3153 |
| MYLK | MYLK | NM_053032.2:710 |
| MYOF | MYOF | NM_013451.3:4870 |
| NDRG1 | NDRG1 | NM_001135242.1:2720 |
| NLGN1 | NLGN1 | NM_014932.2:495 |
| NOTCH2 | NOTCH2 | NM_024408.3:2842 |
| NOVA1 | NOVA1 | NM_006489.2:626 |
| NPL | NPL | NM_001200056.1:1295 |
| PDGFRA | PDGFRA | NM_006206.3:1925 |
| PDPN | PDPN | NM_006474.4:431 |
| PGD | PGD | NM_002631.2:1472 |
| PLIN2 | PLIN2 | NM_001122.3:418 |
| PLN | PLN | NM_002667.3:212 |
| PLTP | PLTP | NM_006227.2:1378 |
| PON3 | PON3 | NM_000940.2:243 |
| PRKX | PRKX | NM_005044.1:2590 |
| PSAP | PSAP | NM_001042465.1:2275 |
| PTHLH | PTHLH | NM_198965.1:605 |
| PTPN14 | PTPN14 | NM_005401.4:3770 |
| PYGL | PYGL | NM_002863.3:555 |
| RNASET2 | RNASET2 | NM_003730.4:904 |
| RPL19_all | RPL19 | NM_000981.3:315 |
| SAMD9L | SAMD9L | NM_152703.2:1174 |
| SERPINE1 | SERPINE1 | NM_000602.4:577 |
| SLC1A3 | SLC1A3 | NM_004172.4:558 |
| SNAI2 | SNAI2 | NM_003068.3:740 |
| SP110 | SP110 | NM_004510.3:265 |
| ST18 | ST18 | NM_014682.2:1295 |
| SULF1 | SULF1 | NM_001128204.1:3004 |
| TBP_NM_003194 | TBP | NM_003194.3:25 |
| TBXAS1 | TBXAS1 | NM_001130966.2:1030 |
| THBS1 | THBS1 | NM_003246.2:3465 |
| TLN1 | TLN1 | NM_006289.3:1460 |
| TPD52L1 | TPD52L1 | NM_003287.2:455 |
| TPM2 | TPM2 | NM_003289.3:891 |
| TUBB_all | TUBB | NM_178014.2:1955 |
| VSNL1 | VSNL1 | NM_003385.4:930 |
| WSB1 | WSB1 | NM_015626.8:862 |
| ZMAT4 | ZMAT4 | NM_001135731.1:360 |

**Supplementary Table 3:** Differential expression of transcripts between LUAD versus Control with Fold change more than 10; P-val=<0.001 and FDR P-val=<0.001. two transcripts were up-regulated and 73 transcripts were down-regulated.

| ID | Control Avg (log2) | LUAD Avg (log2) | Gene Symbol | Description | Group | LUAD vs Control Fold Change |
| --- | --- | --- | --- | --- | --- | --- |
| TC04000478.hg.1 | 8.04 | 17.76 | SPP1 | secreted phosphoprotein 1 | Coding | 842.08 |
| TC04001516.hg.1 | 6.38 | 10.73 | CCNA2 | cyclin A2 | Coding | 20.37 |
| TC03002121.hg.1 | 10.19 | 6.87 | ATP13A4 | ATPase type 13A4 | Coding | -10 |
| TC10000979.hg.1 | 13.8 | 10.47 | KLF6 | Kruppel-like factor 6 | Coding | -10.06 |
| TC17001825.hg.1 | 10.06 | 6.72 | ABCA8 | ATP binding cassette subfamily A member 8 | Coding | -10.13 |
| TC04001366.hg.1 | 15.11 | 11.75 | SPARCL1 | SPARC like 1 | Coding | -10.21 |
| TC6_mann_  hap4000149.hg.1 | 9.88 | 6.47 | TNXB | tenascin XB | Coding | -10.63 |
| TC10001064.hg.1 | 11.4 | 7.97 | ITGA8 | integrin alpha 8 | Coding | -10.79 |
| TC03001302.hg.1 | 10.17 | 6.73 | CSRNP1 | cysteine-serine-rich nuclear protein 1 | Coding | -10.86 |
| TC01003500.hg.1 | 11.05 | 7.61 | SELL | selectin L | Coding | -10.86 |
| TC12001178.hg.1 | 10.74 | 7.28 | CLEC4E | C-type lectin domain family 4, member E | Coding | -11.02 |
| TC17000540.hg.1 | 11.37 | 7.9 | AOC3 | amine oxidase, copper containing 3 | Coding | -11.08 |
| TC12001681.hg.1 | 10.38 | 6.9 | WIF1 | WNT inhibitory factor 1 | Coding | -11.14 |
| TC19000865.hg.1 | 11.59 | 8.1 | MYADM | myeloid-associated differentiation marker | Coding | -11.29 |
| TC19001103.hg.1 | 15.12 | 11.61 | C3 | complement component 3 | Coding | -11.36 |
| TC16001135.hg.1 | 10.68 | 7.16 | MT1G | metallothionein 1G | Coding | -11.5 |
| TC16000468.hg.1 | 14.34 | 10.77 | MT1E | metallothionein 1E | Coding | -11.9 |
| TC14001443.hg.1 | 10.98 | 7.4 | FBLN5 | fibulin 5 | Coding | -11.95 |
| TC14000471.hg.1 | 12.74 | 9.14 | FOS | FBJ murine osteosarcoma viral oncogene homolog | Coding | -12.18 |
| TC11000467.hg.1 | 14.26 | 10.64 | SERPING1 | serpin peptidase inhibitor, clade G (C1 inhibitor), member 1 | Coding | -12.33 |
| TC02000270.hg.1 | 11.89 | 8.19 | PLEKHH2 | pleckstrin homology domain containing, family H (with MyTH4 domain) member 2 | Coding | -13.08 |
| TC16000514.hg.1 | 12.46 | 8.74 | CDH5 | cadherin 5, type 2 (vascular endothelium) | Coding | -13.17 |
| TC17000117.hg.1 | 10.68 | 6.95 | KDM6B | lysine (K)-specific demethylase 6B | Coding | -13.21 |
| TC17001917.hg.1 | 10.48 | 6.71 | SOCS3 | suppressor of cytokine signaling 3 | Coding | -13.57 |
| TC19000321.hg.1 | 11.58 | 7.78 | KLF2 | Kruppel-like factor 2 | Coding | -13.93 |
| TC06001027.hg.1 | 14.36 | 10.56 | TNFAIP3 | tumor necrosis factor, alpha-induced protein 3 | Coding | -13.98 |
| TC04002952.hg.1 | 11.24 | 7.39 | AREG | amphiregulin | Coding | -14.41 |
| TC06000820.hg.1 | 11.13 | 7.28 | FHL5 | four and a half LIM domains 5 | Coding | -14.43 |
| TC16000898.hg.1 | 13.03 | 9.16 | MYH11 | myosin, heavy chain 11, smooth muscle | Coding | -14.64 |
| TC05002066.hg.1 | 13.36 | 9.46 | DUSP1 | dual specificity phosphatase 1 | Coding | -14.91 |
| TC02004994.hg.1 | 10.99 | 7.06 | IL1RL1 | interleukin 1 receptor-like 1 | Coding | -15.18 |
| TC04002953.hg.1 | 11.23 | 7.3 | AREG | amphiregulin | Coding | -15.24 |
| TC11001026.hg.1 | 11.19 | 7.25 | ZBTB16 | zinc finger and BTB domain containing 16 | Coding | -15.43 |
| TC01006383.hg.1 | 11.28 | 7.32 | MUC1 | mucin 1, cell surface associated | Coding | -15.54 |
| TC19000228.hg.1 | 12.61 | 8.65 | JUNB | jun B proto-oncogene | Coding | -15.56 |
| TC05000187.hg.1 | 15.01 | 11.04 | C7 | complement component 7 | Coding | -15.7 |
| TC01001685.hg.1 | 13.83 | 9.73 | BTG2 | BTG family, member 2 | Coding | -17.21 |
| TC16000660.hg.1 | 12.55 | 8.41 | CRISPLD2 | cysteine-rich secretory protein LCCL domain containing 2 | Coding | -17.63 |
| TC19000055.hg.1 | 12.88 | 8.64 | GADD45B | growth arrest and DNA-damage-inducible, beta | Coding | -18.93 |
| TC19000174.hg.1 | 13.79 | 9.49 | ICAM1 | intercellular adhesion molecule 1 | Coding | -19.68 |
| TC02002627.hg.1 | 11.87 | 7.55 | SDPR | serum deprivation response | Coding | -19.85 |
| TC12000189.hg.1 | 15.64 | 11.32 | EMP1 | epithelial membrane protein 1 | Coding | -20.04 |
| TC07001582.hg.1 | 12.58 | 8.23 | STEAP4 | STEAP family member 4 | Coding | -20.47 |
| TC19001285.hg.1 | 10.12 | 5.75 | JUND | jun D proto-oncogene | Coding | -20.65 |
| TC04001286.hg.1 | 12.69 | 8.3 | CXCL2 | chemokine (C-X-C motif) ligand 2 | Coding | -20.87 |
| TC01001488.hg.1 | 12.04 | 7.64 | FMO2 | flavin containing monooxygenase 2 | Coding | -21.1 |
| TC01001686.hg.1 | 12.21 | 7.81 | PRELP | proline/arginine-rich end leucine-rich repeat protein | Coding | -21.23 |
| TC19000191.hg.1 | 12.52 | 8.08 | LDLR | low density lipoprotein receptor | Coding | -21.72 |
| TC02002046.hg.1 | 16.06 | 11.62 | SFTPB | surfactant protein B | Coding | -21.77 |
| TC17001243.hg.1 | 13 | 8.53 | MFAP4 | microfibrillar associated protein 4 | Coding | -22.18 |
| TC01003638.hg.1 | 12.13 | 7.64 | PTGS2 | prostaglandin-endoperoxide synthase 2 (prostaglandin G/H synthase and cyclooxygenase) | Coding | -22.53 |
| TC21000506.hg.1 | 12.88 | 8.38 | SIK1 | salt-inducible kinase 1 | Coding | -22.55 |
| TC02002500.hg.1 | 12.03 | 7.52 | SCN7A | sodium channel, voltage gated, type VII alpha subunit | Coding | -22.81 |
| TC10001454.hg.1 | 16.38 | 11.85 | SFTPA2; SFTPA1 | surfactant protein A2; surfactant protein A1 | Coding | -23.07 |
| TC16000476.hg.1 | 14.26 | 9.66 | MT1X | metallothionein 1X | Coding | -24.15 |
| TC12000414.hg.1 | 12.13 | 7.47 | NR4A1 | nuclear receptor subfamily 4, group A, member 1 | Coding | -25.15 |
| TC16002035.hg.1 | 12.67 | 7.99 | MT1A | metallothionein 1A | Coding | -25.54 |
| TC02000281.hg.1 | 14.69 | 9.99 | EPAS1 | endothelial PAS domain protein 1 | Coding | -25.88 |
| TC03000742.hg.1 | 11.82 | 7.04 | CLDN18 | claudin 18 | Coding | -27.53 |
| TC16002034.hg.1 | 16.24 | 11.45 | MT2A | metallothionein 2A | Coding | -27.73 |
| TC12001587.hg.1 | 12.27 | 7.45 | MMP19 | matrix metallopeptidase 19 | Coding | -28.26 |
| TC21000345.hg.1 | 13.14 | 8.31 | ADAMTS1 | ADAM metallopeptidase with thrombospondin type 1 motif 1 | Coding | -28.5 |
| TC12000309.hg.1 | 14.17 | 9.33 | LRRK2 | leucine-rich repeat kinase 2 | Coding | -28.6 |
| TC03001612.hg.1 | 13.67 | 8.72 | ABI3BP | ABI family, member 3 (NESH) binding protein | Coding | -30.92 |
| TC05000701.hg.1 | 15.96 | 10.93 | EGR1 | early growth response 1 | Coding | -32.62 |
| TC12000182.hg.1 | 13.73 | 8.63 | GPRC5A; MIR614 | G protein-coupled receptor, class C, group 5, member A; microRNA 614 | Coding | -34.43 |
| TC09000508.hg.1 | 11.57 | 6.44 | NR4A3 | nuclear receptor subfamily 4, group A, member 3 | Coding | -35.03 |
| TC10000569.hg.1 | 15.94 | 10.79 | SFTPA1 | surfactant protein A1 | Coding | -35.68 |
| TC04001410.hg.1 | 13.92 | 8.52 | ADH1B | alcohol dehydrogenase 1B (class I), beta polypeptide | Coding | -42.31 |
| TC06001722.hg.1 | 11.52 | 6.06 | PGC | progastricsin (pepsinogen C) | Coding | -44.25 |
| TC16002074.hg.1 | 14.04 | 8.26 | MT1M | metallothionein 1M | Coding | -55.2 |
| TC02002445.hg.1 | 13.77 | 7.61 | NR4A2 | nuclear receptor subfamily 4, group A, member 2 | Coding | -71.52 |
| TC19000647.hg.1 | 13.87 | 7.46 | FOSB | FBJ murine osteosarcoma viral oncogene homolog B | Coding | -84.47 |
| TC20000876.hg.1 | 15.92 | 8.54 | SLPI | secretory leukocyte peptidase inhibitor | Coding | -166.43 |
| TC19000544.hg.1 | 17.22 | 9 | ZFP36 | ZFP36 ring finger protein | Coding | -299.59 |

**Supplementary Table 4:** Differential expression of transcripts between LUSC versus Control with Fold change more than 10; P-val=<0.001 and FDR P-val=<0.001. 12 transcripts were up-regulated and 263 transcripts were down-regulated.

| ID | LC Avg (log2) | LUSC Avg (log2) | Gene Symbol | Description | Group | LUSC vs LC Fold Change |
| --- | --- | --- | --- | --- | --- | --- |
| TC15000409.hg.1 | 5.37 | 11.44 | SCG3 | secretogranin III | Coding | 66.75 |
| TC06000761.hg.1 | 6.24 | 11.35 | TTK | TTK protein kinase | Coding | 34.6 |
| TC03000620.hg.1 | 5.23 | 10.34 | STXBP5L | syntaxin binding protein 5-like | Coding | 34.53 |
| TC06001952.hg.1 | 5.8 | 10.89 | EPHA7 | EPH receptor A7 | Coding | 34.04 |
| TC08000476.hg.1 | 5.39 | 10.39 | KCNB2 | potassium channel, voltage gated Shab related subfamily B, member 2 | Coding | 31.88 |
| TC10000659.hg.1 | 6.41 | 11.36 | KIF11 | kinesin family member 11 | Coding | 30.94 |
| TC01001753.hg.1 | 5.09 | 9.37 | SYT14 | synaptotagmin XIV | Coding | 19.39 |
| TC08000650.hg.1 | 5.08 | 9.27 | RIMS2 | regulating synaptic membrane exocytosis 2 | Coding | 18.24 |
| TC08001584.hg.1 | 7.99 | 12.13 | ATAD2 | ATPase family, AAA domain containing 2 | Coding | 17.67 |
| TC04001516.hg.1 | 6.38 | 10.26 | CCNA2 | cyclin A2 | Coding | 14.73 |
| TC08000493.hg.1 | 7.46 | 10.97 | GDAP1 | ganglioside induced differentiation associated protein 1 | Coding | 11.44 |
| TC07001565.hg.1 | 6.44 | 9.92 | PCLO | piccolo presynaptic cytomatrix protein | Coding | 11.17 |
| TC6_cox_hap2000237.hg.1 | 11.23 | 7.9 | HLA-B | major histocompatibility complex, class I, B | Coding | -10.05 |
| TC01001738.hg.1 | 10.33 | 6.99 | CR1 | complement component (3b/4b) receptor 1 (Knops blood group) | Coding | -10.07 |
| TC6_ssto_hap7000191.hg.1 | 11.02 | 7.69 | HLA-B | major histocompatibility complex, class I, B | Coding | -10.1 |
| TC02002452.hg.1 | 10.36 | 7 | CYTIP | cytohesin 1 interacting protein | Coding | -10.27 |
| TC19001787.hg.1 | 9.44 | 6.08 | FPR1 | formyl peptide receptor 1 | Coding | -10.29 |
| TC12001681.hg.1 | 10.38 | 7.01 | WIF1 | WNT inhibitory factor 1 | Coding | -10.35 |
| TC17001029.hg.1 | 10.62 | 7.25 | CXCL16 | chemokine (C-X-C motif) ligand 16 | Coding | -10.39 |
| TC06001074.hg.1 | 10.23 | 6.85 | SASH1 | SAM and SH3 domain containing 1 | Coding | -10.45 |
| TC08000203.hg.1 | 12.43 | 9.03 | DPYSL2 | dihydropyrimidinase-like 2 | Coding | -10.52 |
| TC12000060.hg.1 | 10.1 | 6.69 | CCND2 | cyclin D2 | Coding | -10.63 |
| TC0X001278.hg.1 | 10.33 | 6.92 | CHRDL1 | chordin-like 1 | Coding | -10.63 |
| TC03001302.hg.1 | 10.17 | 6.76 | CSRNP1 | cysteine-serine-rich nuclear protein 1 | Coding | -10.64 |
| TC01002849.hg.1 | 10.3 | 6.88 | GBP4 | guanylate binding protein 4 | Coding | -10.7 |
| TC6_mcf_hap5000195.hg.1 | 11.61 | 8.17 | HLA-B | major histocompatibility complex, class I, B | Coding | -10.8 |
| TC01002847.hg.1 | 10.95 | 7.52 | GBP1 | guanylate binding protein 1, interferon-inducible | Coding | -10.82 |
| TC02000398.hg.1 | 9.59 | 6.15 | PLEK | pleckstrin | Coding | -10.89 |
| TC01000272.hg.1 | 10.21 | 6.75 | ALPL | alkaline phosphatase, liver/bone/kidney | Coding | -11.02 |
| TC01003260.hg.1 | 10.38 | 6.91 | S100A12 | S100 calcium binding protein A12 | Coding | -11.11 |
| TC12003212.hg.1 | 11.04 | 7.54 | ALDH2 | aldehyde dehydrogenase 2 family (mitochondrial) | Coding | -11.33 |
| TC06001165.hg.1 | 11.21 | 7.7 | QKI | QKI, KH domain containing, RNA binding | Coding | -11.39 |
| TC17001825.hg.1 | 10.06 | 6.55 | ABCA8 | ATP binding cassette subfamily A member 8 | Coding | -11.44 |
| TC06001717.hg.1 | 11.41 | 7.88 | TREM1 | triggering receptor expressed on myeloid cells 1 | Coding | -11.55 |
| TC13000411.hg.1 | 11.07 | 7.53 | ATP11A | ATPase, class VI, type 11A | Coding | -11.63 |
| TC04000632.hg.1 | 10.36 | 6.8 | SPRY1 | sprouty RTK signaling antagonist 1 | Coding | -11.73 |
| TC6_dbb_hap3000210.hg.1 | 10.87 | 7.31 | HLA-DMA | major histocompatibility complex, class II, DM alpha | Coding | -11.82 |
| TC6_apd_hap1000118.hg.1 | 10.88 | 7.32 | HLA-DMA | major histocompatibility complex, class II, DM alpha | Coding | -11.83 |
| TC12001227.hg.1 | 13.35 | 9.78 | YBX3 | Y box binding protein 3 | Coding | -11.85 |
| TC6_mann_hap4000149.hg.1 | 9.88 | 6.31 | TNXB | tenascin XB | Coding | -11.86 |
| TC16000455.hg.1 | 10.66 | 7.09 | LPCAT2 | lysophosphatidylcholine acyltransferase 2 | Coding | -11.86 |
| TC01006308.hg.1 | 11.32 | 7.74 | FCGR3B | Fc fragment of IgG, low affinity IIIb, receptor (CD16b) | Coding | -11.95 |
| TC02000183.hg.1 | 10.7 | 7.1 | FOSL2 | FOS-like antigen 2 | Coding | -12.1 |
| TC01006339.hg.1 | 10.55 | 6.94 | FCGR2C | Fc fragment of IgG, low affinity IIc, receptor for (CD32) (gene/pseudogene) | Coding | -12.14 |
| TC14001253.hg.1 | 10.77 | 7.17 | ZFP36L1 | ZFP36 ring finger protein-like 1 | Coding | -12.15 |
| TC09001609.hg.1 | 11.85 | 8.24 | ENG | endoglin | Coding | -12.2 |
| TC12001620.hg.1 | 11.59 | 7.97 | STAT6 | signal transducer and activator of transcription 6, interleukin-4 induced | Coding | -12.24 |
| TC03003320.hg.1 | 11.65 | 8.03 | NFKBIZ | nuclear factor of kappa light polypeptide gene enhancer in B-cells inhibitor, zeta | Coding | -12.35 |
| TC19000180.hg.1 | 11.53 | 7.9 | SLC44A2 | solute carrier family 44 (choline transporter), member 2 | Coding | -12.37 |
| TC12001300.hg.1 | 10.99 | 7.36 | ABCC9 | ATP binding cassette subfamily C member 9 | Coding | -12.38 |
| TC17000117.hg.1 | 10.68 | 7.05 | KDM6B | lysine (K)-specific demethylase 6B | Coding | -12.4 |
| TC11000175.hg.1 | 11.79 | 8.16 | SWAP70 | SWAP switching B-cell complex 70kDa subunit | Coding | -12.41 |
| TC19000865.hg.1 | 11.59 | 7.96 | MYADM | myeloid-associated differentiation marker | Coding | -12.43 |
| TC10000362.hg.1 | 10.45 | 6.81 | BICC1 | BicC family RNA binding protein 1 | Coding | -12.48 |
| TC08001120.hg.1 | 10.58 | 6.92 | RNF122 | ring finger protein 122 | Coding | -12.58 |
| TC03002121.hg.1 | 10.19 | 6.54 | ATP13A4 | ATPase type 13A4 | Coding | -12.59 |
| TC11002175.hg.1 | 11.8 | 8.14 | CTSC | cathepsin C | Coding | -12.63 |
| TC01000909.hg.1 | 9.5 | 5.83 | S1PR1 | sphingosine-1-phosphate receptor 1 | Coding | -12.7 |
| TC06000844.hg.1 | 10.23 | 6.55 | PRDM1 | PR domain containing 1, with ZNF domain | Coding | -12.81 |
| TC11000954.hg.1 | 10.68 | 6.99 | YAP1 | Yes-associated protein 1 | Coding | -12.9 |
| TC02002905.hg.1 | 11.58 | 7.89 | COL6A3 | collagen, type VI, alpha 3 | Coding | -12.93 |
| TC01000510.hg.1 | 11.83 | 8.13 | SMAP2 | small ArfGAP2 | Coding | -13 |
| TC6_apd_hap1000107.hg.1 | 11.57 | 7.86 | HLA-DPA1 | major histocompatibility complex, class II, DP alpha 1 | Coding | -13.15 |
| TC6_mcf_hap5000177.hg.1 | 11.57 | 7.86 | HLA-DPA1 | major histocompatibility complex, class II, DP alpha 1 | Coding | -13.15 |
| TC0X001416.hg.1 | 10.9 | 7.18 | ARHGEF6 | Rac/Cdc42 guanine nucleotide exchange factor 6 | Coding | -13.16 |
| TC02000315.hg.1 | 15.62 | 11.89 | SPTBN1 | spectrin, beta, non-erythrocytic 1 | Coding | -13.22 |
| TC6_ssto_hap7000172.hg.1 | 11.66 | 7.93 | HLA-DPA1 | major histocompatibility complex, class II, DP alpha 1 | Coding | -13.25 |
| TC06001578.hg.1 | 11.56 | 7.83 | HLA-DPA1 | major histocompatibility complex, class II, DP alpha 1 | Coding | -13.28 |
| TC6_dbb_hap3000188.hg.1 | 11.56 | 7.83 | HLA-DPA1 | major histocompatibility complex, class II, DP alpha 1 | Coding | -13.28 |
| TC08000293.hg.1 | 11.38 | 7.64 | TACC1 | transforming, acidic coiled-coil containing protein 1 | Coding | -13.38 |
| TC6_mann_hap4000170.hg.1 | 11.44 | 7.69 | HLA-DPA1 | major histocompatibility complex, class II, DP alpha 1 | Coding | -13.44 |
| TC6_qbl_hap6000190.hg.1 | 11.44 | 7.69 | HLA-DPA1 | major histocompatibility complex, class II, DP alpha 1 | Coding | -13.44 |
| TC04000609.hg.1 | 10.39 | 6.64 | SYNPO2 | synaptopodin 2 | Coding | -13.45 |
| TC20000587.hg.1 | 10.83 | 7.08 | RASSF2 | Ras association (RalGDS/AF-6) domain family member 2 | Coding | -13.47 |
| TC17000540.hg.1 | 11.37 | 7.6 | AOC3 | amine oxidase, copper containing 3 | Coding | -13.72 |
| TC04000636.hg.1 | 10.14 | 6.36 | FAT4 | FAT atypical cadherin 4 | Coding | -13.72 |
| TC12001507.hg.1 | 10.68 | 6.89 | BIN2 | bridging integrator 2 | Coding | -13.77 |
| TC04001637.hg.1 | 11.07 | 7.29 | SH3D19 | SH3 domain containing 19 | Coding | -13.78 |
| TC05001854.hg.1 | 10.81 | 7.03 | HBEGF | heparin-binding EGF-like growth factor | Coding | -13.81 |
| TC06004060.hg.1 | 12.45 | 8.65 | HLA-B | major histocompatibility complex, class I, B | Coding | -13.88 |
| TC19000256.hg.1 | 11.39 | 7.59 | ADGRE5 | adhesion G protein-coupled receptor E5 | Coding | -13.91 |
| TC12001705.hg.1 | 11.44 | 7.62 | CPM | carboxypeptidase M | Coding | -14.09 |
| TC11000505.hg.1 | 10.48 | 6.63 | MS4A2 | membrane-spanning 4-domains, subfamily A, member 2 | Coding | -14.39 |
| TC11001026.hg.1 | 11.19 | 7.33 | ZBTB16 | zinc finger and BTB domain containing 16 | Coding | -14.58 |
| TC19000676.hg.1 | 10.89 | 7.01 | C5AR1 | complement component 5a receptor 1 | Coding | -14.76 |
| TC06000795.hg.1 | 14.02 | 10.12 | PNRC1 | proline-rich nuclear receptor coactivator 1 | Coding | -14.89 |
| TC01006383.hg.1 | 11.28 | 7.37 | MUC1 | mucin 1, cell surface associated | Coding | -14.97 |
| TC02000230.hg.1 | 10.89 | 6.98 | CRIM1 | cysteine rich transmembrane BMP regulator 1 (chordin-like) | Coding | -15 |
| TC06001273.hg.1 | 10.7 | 6.78 | NEDD9 | neural precursor cell expressed, developmentally down-regulated 9 | Coding | -15.14 |
| TC05001295.hg.1 | 10.68 | 6.76 | FYB | FYN binding protein | Coding | -15.16 |
| TC13000642.hg.1 | 11.4 | 7.48 | LCP1 | lymphocyte cytosolic protein 1 (L-plastin) | Coding | -15.19 |
| TC02001867.hg.1 | 11.61 | 7.68 | EFEMP1 | EGF containing fibulin-like extracellular matrix protein 1 | Coding | -15.22 |
| TC01006361.hg.1 | 10.73 | 6.79 | GBP2 | guanylate binding protein 2, interferon-inducible | Coding | -15.3 |
| TC0X001530.hg.1 | 12.01 | 8.07 | FLNA | filamin A, alpha | Coding | -15.32 |
| TC6_cox_hap2000202.hg.1 | 11.95 | 8.01 | HLA-DPA1 | major histocompatibility complex, class II, DP alpha 1 | Coding | -15.33 |
| TC10000081.hg.1 | 11.35 | 7.4 | CELF2 | CUGBP, Elav-like family member 2 | Coding | -15.4 |
| TC04002931.hg.1 | 10.98 | 7.02 | PDGFRA | platelet-derived growth factor receptor, alpha polypeptide | Coding | -15.51 |
| TC07003339.hg.1 | 11.77 | 7.8 | CAV1 | caveolin 1 | Coding | -15.68 |
| TC09001325.hg.1 | 11.26 | 7.28 | NFIL3 | nuclear factor, interleukin 3 regulated | Coding | -15.78 |
| TC06002121.hg.1 | 10.37 | 6.37 | VNN2 | vanin 2 | Coding | -15.94 |
| TC6_qbl_hap6000147.hg.1 | 12.96 | 8.93 | HLA-B | major histocompatibility complex, class I, B | Coding | -16.37 |
| TC6_dbb_hap3000145.hg.1 | 13.18 | 9.14 | HLA-C; HLA-B | major histocompatibility complex, class I, C; major histocompatibility complex, class I, B | Coding | -16.45 |
| TC6_qbl_hap6000146.hg.1 | 12.93 | 8.87 | HLA-C; HLA-B | major histocompatibility complex, class I, C; major histocompatibility complex, class I, B | Coding | -16.7 |
| TC6_ssto_hap7000190.hg.1 | 12.93 | 8.87 | HLA-C | major histocompatibility complex, class I, C | Coding | -16.7 |
| TC06000820.hg.1 | 11.13 | 7.07 | FHL5 | four and a half LIM domains 5 | Coding | -16.74 |
| TC12000642.hg.1 | 11.39 | 7.32 | GLIPR1 | GLI pathogenesis-related 1 | Coding | -16.77 |
| TC01001382.hg.1 | 11.6 | 7.52 | FCER1G | Fc fragment of IgE, high affinity I, receptor for; gamma polypeptide | Coding | -16.85 |
| TC14001443.hg.1 | 10.98 | 6.9 | FBLN5 | fibulin 5 | Coding | -16.96 |
| TC17001827.hg.1 | 10.94 | 6.84 | ABCA6 | ATP binding cassette subfamily A member 6 | Coding | -17.07 |
| TC6_mann_hap4000187.hg.1 | 13.56 | 9.45 | HLA-C; HLA-B | major histocompatibility complex, class I, C; major histocompatibility complex, class I, B | Coding | -17.29 |
| TC05000837.hg.1 | 11.26 | 7.15 | GPX3 | glutathione peroxidase 3 | Coding | -17.33 |
| TC01001688.hg.1 | 11.58 | 7.45 | ATP2B4 | ATPase, Ca++ transporting, plasma membrane 4 | Coding | -17.5 |
| TC01001736.hg.1 | 13.24 | 9.1 | CD55 | CD55 molecule, decay accelerating factor for complement (Cromer blood group) | Coding | -17.59 |
| TC19000235.hg.1 | 11.81 | 7.67 | NFIX | nuclear factor I/X (CCAAT-binding transcription factor) | Coding | -17.72 |
| TC12001207.hg.1 | 10.04 | 5.88 | CD69 | CD69 molecule | Coding | -17.86 |
| TC03000015.hg.1 | 11.41 | 7.25 | BHLHE40 | basic helix-loop-helix family, member e40 | Coding | -17.88 |
| TC15001713.hg.1 | 11.09 | 6.89 | CTSH | cathepsin H | Coding | -18.41 |
| TC14001307.hg.1 | 12.22 | 8 | NPC2; MIR4709 | Niemann-Pick disease, type C2; microRNA 4709 | Coding | -18.62 |
| TC20000642.hg.1 | 11.01 | 6.79 | FLRT3 | fibronectin leucine rich transmembrane protein 3 | Coding | -18.71 |
| TC11001818.hg.1 | 11.23 | 6.98 | MPEG1 | macrophage expressed 1 | Coding | -19.05 |
| TC09000343.hg.1 | 13.29 | 9.03 | OSTF1 | osteoclast stimulating factor 1 | Coding | -19.17 |
| TC03000607.hg.1 | 10.93 | 6.64 | ARHGAP31 | Rho GTPase activating protein 31 | Coding | -19.53 |
| TC17001917.hg.1 | 10.48 | 6.17 | SOCS3 | suppressor of cytokine signaling 3 | Coding | -19.74 |
| TC18000273.hg.1 | 11.45 | 7.13 | COLEC12 | collectin sub-family member 12 | Coding | -19.9 |
| TC04001366.hg.1 | 15.11 | 10.73 | SPARCL1 | SPARC like 1 | Coding | -20.73 |
| TC02002765.hg.1 | 11.7 | 7.32 | TNS1 | tensin 1 | Coding | -20.77 |
| TC12001269.hg.1 | 11.55 | 7.15 | PLBD1 | phospholipase B domain containing 1 | Coding | -21.15 |
| TC19001285.hg.1 | 10.12 | 5.7 | JUND | jun D proto-oncogene | Coding | -21.33 |
| TC01003205.hg.1 | 15.09 | 10.68 | MCL1 | myeloid cell leukemia 1 | Coding | -21.34 |
| TC19000321.hg.1 | 11.58 | 7.14 | KLF2 | Kruppel-like factor 2 | Coding | -21.68 |
| TC09000149.hg.1 | 14.41 | 9.96 | ANXA2; ANXA2P2 | annexin A2; annexin A2 pseudogene 2 | Coding | -21.78 |
| TC01001346.hg.1 | 11.81 | 7.35 | MNDA | myeloid cell nuclear differentiation antigen | Coding | -22.09 |
| TC15001505.hg.1 | 12.8 | 8.33 | ANXA2 | annexin A2 | Coding | -22.13 |
| TC12001178.hg.1 | 10.74 | 6.27 | CLEC4E | C-type lectin domain family 4, member E | Coding | -22.22 |
| TC22000248.hg.1 | 12.12 | 7.63 | TIMP3 | TIMP metallopeptidase inhibitor 3 | Coding | -22.38 |
| TC04001809.hg.1 | 12.79 | 8.28 | ACSL1 | acyl-CoA synthetase long-chain family member 1 | Coding | -22.77 |
| TC15000827.hg.1 | 13.31 | 8.78 | AKAP13 | A kinase (PRKA) anchor protein 13 | Coding | -23.12 |
| TC21000169.hg.1 | 13.57 | 9.03 | ETS2 | v-ets avian erythroblastosis virus E26 oncogene homolog 2 | Coding | -23.28 |
| TC6_mcf_hap5000194.hg.1 | 13 | 8.44 | HLA-C; HLA-B | major histocompatibility complex, class I, C; major histocompatibility complex, class I, B | Coding | -23.56 |
| TC12001130.hg.1 | 12.09 | 7.49 | VWF | von Willebrand factor | Coding | -24.23 |
| TC12000414.hg.1 | 12.13 | 7.53 | NR4A1 | nuclear receptor subfamily 4, group A, member 1 | Coding | -24.25 |
| TC13000147.hg.1 | 11.99 | 7.39 | RGCC | regulator of cell cycle | Coding | -24.31 |
| TC12001170.hg.1 | 13.02 | 8.41 | SLC2A3 | solute carrier family 2 (facilitated glucose transporter), member 3 | Coding | -24.48 |
| TC10001064.hg.1 | 11.4 | 6.78 | ITGA8 | integrin alpha 8 | Coding | -24.69 |
| TC15000441.hg.1 | 10.87 | 6.2 | AQP9 | aquaporin 9 | Coding | -25.41 |
| TC11001230.hg.1 | 15.18 | 10.51 | IFITM3 | interferon induced transmembrane protein 3 | Coding | -25.6 |
| TC01003500.hg.1 | 11.05 | 6.37 | SELL | selectin L | Coding | -25.72 |
| TC17000103.hg.1 | 14.07 | 9.38 | CD68 | CD68 molecule | Coding | -25.78 |
| TC01000968.hg.1 | 11.75 | 7.06 | CD53 | CD53 molecule | Coding | -25.82 |
| TC12000521.hg.1 | 12.38 | 7.68 | LRP1 | LDL receptor related protein 1 | Coding | -25.93 |
| TC09000508.hg.1 | 11.57 | 6.87 | NR4A3 | nuclear receptor subfamily 4, group A, member 3 | Coding | -26.04 |
| TC07001546.hg.1 | 12.98 | 8.27 | FGL2 | fibrinogen-like 2 | Coding | -26.09 |
| TC06004141.hg.1 | 13.77 | 9.05 | SOD2 | superoxide dismutase 2, mitochondrial | Coding | -26.28 |
| TC02004994.hg.1 | 10.99 | 6.24 | IL1RL1 | interleukin 1 receptor-like 1 | Coding | -26.89 |
| TC03000742.hg.1 | 11.82 | 7.06 | CLDN18 | claudin 18 | Coding | -27.05 |
| TC04000158.hg.1 | 11.94 | 7.17 | SLIT2 | slit guidance ligand 2 | Coding | -27.13 |
| TC21000506.hg.1 | 12.88 | 8.11 | SIK1 | salt-inducible kinase 1 | Coding | -27.15 |
| TC01003210.hg.1 | 13.32 | 8.55 | CTSS | cathepsin S | Coding | -27.45 |
| TC17001157.hg.1 | 12.62 | 7.84 | PMP22 | peripheral myelin protein 22 | Coding | -27.49 |
| TC06001775.hg.1 | 12.73 | 7.94 | ADGRF5 | adhesion G protein-coupled receptor F5 | Coding | -27.64 |
| TC06001057.hg.1 | 10.43 | 5.63 | STX11 | syntaxin 11 | Coding | -27.77 |
| TC10000126.hg.1 | 13.88 | 9.07 | VIM | vimentin | Coding | -28.11 |
| TC06000945.hg.1 | 11.78 | 6.96 | GJA1 | gap junction protein alpha 1 | Coding | -28.25 |
| TC19000191.hg.1 | 12.52 | 7.69 | LDLR | low density lipoprotein receptor | Coding | -28.36 |
| TC12001278.hg.1 | 12.49 | 7.61 | ARHGDIB | Rho GDP dissociation inhibitor (GDI) beta | Coding | -29.4 |
| TC20000833.hg.1 | 11.91 | 7.03 | TGM2 | transglutaminase 2 | Coding | -29.41 |
| TC13000829.hg.1 | 11.81 | 6.91 | GPR183 | G protein-coupled receptor 183 | Coding | -29.86 |
| TC01001686.hg.1 | 12.21 | 7.3 | PRELP | proline/arginine-rich end leucine-rich repeat protein | Coding | -30.11 |
| TC12000793.hg.1 | 12.13 | 7.18 | DRAM1 | DNA-damage regulated autophagy modulator 1 | Coding | -30.98 |
| TC01001348.hg.1 | 12.74 | 7.78 | IFI16 | interferon, gamma-inducible protein 16 | Coding | -31.1 |
| TC05000179.hg.1 | 11.84 | 6.87 | OSMR | oncostatin M receptor | Coding | -31.47 |
| TC17001341.hg.1 | 11.07 | 6.08 | EVI2B | ecotropic viral integration site 2B | Coding | -31.75 |
| TC17001243.hg.1 | 13 | 8.01 | MFAP4 | microfibrillar associated protein 4 | Coding | -31.79 |
| TC19000717.hg.1 | 17.32 | 12.31 | FTL | ferritin, light polypeptide | Coding | -32.11 |
| TC07000112.hg.1 | 13.93 | 8.91 | AHR | aryl hydrocarbon receptor | Coding | -32.41 |
| TC06004123.hg.1 | 13.37 | 8.35 | HLA-DRB1 | major histocompatibility complex, class II, DR beta 1 | Coding | -32.5 |
| TC18000047.hg.1 | 14.11 | 9.03 | RAB31 | RAB31, member RAS oncogene family | Coding | -33.82 |
| TC05001936.hg.1 | 15.02 | 9.91 | CD74 | CD74 molecule, major histocompatibility complex, class II invariant chain | Coding | -34.52 |
| TC20000703.hg.1 | 12.28 | 7.17 | CD93 | CD93 molecule | Coding | -34.56 |
| TC01001685.hg.1 | 13.83 | 8.69 | BTG2 | BTG family, member 2 | Coding | -35.33 |
| TC02001790.hg.1 | 12.5 | 7.35 | ZFP36L2 | ZFP36 ring finger protein-like 2 | Coding | -35.46 |
| TC04002952.hg.1 | 11.24 | 6.06 | AREG | amphiregulin | Coding | -36.29 |
| TC16000514.hg.1 | 12.46 | 7.27 | CDH5 | cadherin 5, type 2 (vascular endothelium) | Coding | -36.43 |
| TC16000660.hg.1 | 12.55 | 7.35 | CRISPLD2 | cysteine-rich secretory protein LCCL domain containing 2 | Coding | -36.67 |
| TC03001720.hg.1 | 12.97 | 7.74 | HEG1 | heart development protein with EGF-like domains 1 | Coding | -37.65 |
| TC10000979.hg.1 | 13.8 | 8.56 | KLF6 | Kruppel-like factor 6 | Coding | -37.71 |
| TC01001488.hg.1 | 12.04 | 6.8 | FMO2 | flavin containing monooxygenase 2 | Coding | -37.81 |
| TC06001722.hg.1 | 11.52 | 6.27 | PGC | progastricsin (pepsinogen C) | Coding | -38.05 |
| TC04001286.hg.1 | 12.69 | 7.43 | CXCL2 | chemokine (C-X-C motif) ligand 2 | Coding | -38.28 |
| TC0X000750.hg.1 | 13.46 | 8.18 | BGN | biglycan | Coding | -38.81 |
| TC16001135.hg.1 | 10.68 | 5.4 | MT1G | metallothionein 1G | Coding | -38.86 |
| TC04002953.hg.1 | 11.23 | 5.93 | AREG | amphiregulin | Coding | -39.37 |
| TC0X000353.hg.1 | 15 | 9.64 | MSN | moesin | Coding | -40.95 |
| TC12001587.hg.1 | 12.27 | 6.89 | MMP19 | matrix metallopeptidase 19 | Coding | -41.59 |
| TC02002627.hg.1 | 11.87 | 6.48 | SDPR | serum deprivation response | Coding | -41.94 |
| TC21001069.hg.1 | 11.89 | 6.48 | SAMSN1 | SAM domain, SH3 domain and nuclear localization signals 1 | Coding | -42.47 |
| TC16002035.hg.1 | 12.67 | 7.24 | MT1A | metallothionein 1A | Coding | -42.93 |
| TC02002500.hg.1 | 12.03 | 6.6 | SCN7A | sodium channel, voltage gated, type VII alpha subunit | Coding | -43 |
| TC17001798.hg.1 | 12.27 | 6.84 | PECAM1 | platelet/endothelial cell adhesion molecule 1 | Coding | -43.23 |
| TC6_ssto_hap7000163.hg.1 | 14.04 | 8.59 | HLA-DRB1; HLA-DRB4 | major histocompatibility complex, class II, DR beta 1; major histocompatibility complex, class II, DR beta 4 | Coding | -43.66 |
| TC19000055.hg.1 | 12.88 | 7.43 | GADD45B | growth arrest and DNA-damage-inducible, beta | Coding | -43.89 |
| TC03001888.hg.1 | 13.32 | 7.85 | TM4SF1 | transmembrane 4 L six family member 1 | Coding | -44.31 |
| TC10000132.hg.1 | 13.6 | 8.1 | MRC1 | mannose receptor, C type 1 | Coding | -45.01 |
| TC01006291.hg.1 | 12.83 | 7.32 | CFH | complement factor H | Coding | -45.66 |
| TC06000338.hg.1 | 14.26 | 8.72 | HLA-E | major histocompatibility complex, class I, E | Coding | -46.35 |
| TC6_mann_hap4000031.hg.1 | 14.26 | 8.72 | HLA-E | major histocompatibility complex, class I, E | Coding | -46.35 |
| TC6_mcf_hap5000023.hg.1 | 14.26 | 8.72 | HLA-E | major histocompatibility complex, class I, E | Coding | -46.35 |
| TC14000471.hg.1 | 12.74 | 7.21 | FOS | FBJ murine osteosarcoma viral oncogene homolog | Coding | -46.43 |
| TC10000135.hg.1 | 13.54 | 7.99 | MRC1 | mannose receptor, C type 1 | Coding | -46.92 |
| TC6_cox_hap2000193.hg.1 | 14.66 | 9.05 | HLA-DRB1; HLA-DRB3 | major histocompatibility complex, class II, DR beta 1; major histocompatibility complex, class II, DR beta 3 | Coding | -48.82 |
| TC03001651.hg.1 | 12.96 | 7.34 | CCDC80 | coiled-coil domain containing 80 | Coding | -49.3 |
| TC6_mann_hap4000074.hg.1 | 17.15 | 11.52 | HLA-DRA | major histocompatibility complex, class II, DR alpha | Coding | -49.5 |
| TC6_dbb_hap3000083.hg.1 | 17.11 | 11.47 | HLA-DRA | major histocompatibility complex, class II, DR alpha | Coding | -49.62 |
| TC01001640.hg.1 | 12.83 | 7.18 | PTPRC | protein tyrosine phosphatase, receptor type, C | Coding | -50.07 |
| TC06000399.hg.1 | 17.02 | 11.36 | HLA-DRA | major histocompatibility complex, class II, DR alpha | Coding | -50.32 |
| TC6_mcf_hap5000075.hg.1 | 17.16 | 11.48 | HLA-DRA | major histocompatibility complex, class II, DR alpha | Coding | -51.06 |
| TC6_qbl_hap6000081.hg.1 | 17.16 | 11.48 | HLA-DRA | major histocompatibility complex, class II, DR alpha | Coding | -51.06 |
| TC6_ssto_hap7000076.hg.1 | 17.16 | 11.48 | HLA-DRA | major histocompatibility complex, class II, DR alpha | Coding | -51.06 |
| TC6_qbl_hap6000182.hg.1 | 14.6 | 8.92 | HLA-DRB1; HLA-DRB3 | major histocompatibility complex, class II, DR beta 1; major histocompatibility complex, class II, DR beta 3 | Coding | -51.3 |
| TC16000468.hg.1 | 14.34 | 8.66 | MT1E | metallothionein 1E | Coding | -51.3 |
| TC6_cox_hap2000090.hg.1 | 17.01 | 11.32 | HLA-DRA | major histocompatibility complex, class II, DR alpha | Coding | -51.63 |
| TC20000821.hg.1 | 14.1 | 8.4 | SAMHD1 | SAM domain and HD domain 1 | Coding | -52.01 |
| TC16000898.hg.1 | 13.03 | 7.29 | MYH11 | myosin, heavy chain 11, smooth muscle | Coding | -53.42 |
| TC20000268.hg.1 | 13.92 | 8.18 | MYL9 | myosin light chain 9 | Coding | -53.45 |
| TC21000345.hg.1 | 13.14 | 7.4 | ADAMTS1 | ADAM metallopeptidase with thrombospondin type 1 motif 1 | Coding | -53.58 |
| TC12001216.hg.1 | 12.73 | 6.95 | OLR1 | oxidized low density lipoprotein (lectin-like) receptor 1 | Coding | -54.72 |
| TC02002445.hg.1 | 13.77 | 7.98 | NR4A2 | nuclear receptor subfamily 4, group A, member 2 | Coding | -55.39 |
| TC6_cox_hap2000036.hg.1 | 14.26 | 8.46 | HLA-E | major histocompatibility complex, class I, E | Coding | -55.72 |
| TC6_dbb_hap3000029.hg.1 | 14.26 | 8.46 | HLA-E | major histocompatibility complex, class I, E | Coding | -55.72 |
| TC6_qbl_hap6000029.hg.1 | 14.26 | 8.46 | HLA-E | major histocompatibility complex, class I, E | Coding | -55.72 |
| TC6_ssto_hap7000029.hg.1 | 14.26 | 8.46 | HLA-E | major histocompatibility complex, class I, E | Coding | -55.72 |
| TC11000332.hg.1 | 13.67 | 7.81 | CD44 | CD44 molecule (Indian blood group) | Coding | -58.15 |
| TC12001804.hg.1 | 13.84 | 7.93 | DCN | decorin | Coding | -59.98 |
| TC09001547.hg.1 | 14.88 | 8.95 | STOM | stomatin | Coding | -60.97 |
| TC09000335.hg.1 | 14.03 | 8.07 | ANXA1 | annexin A1 | Coding | -62.66 |
| TC03001612.hg.1 | 13.67 | 7.69 | ABI3BP | ABI family, member 3 (NESH) binding protein | Coding | -63 |
| TC10000145.hg.1 | 13.76 | 7.69 | PLXDC2 | plexin domain containing 2 | Coding | -67.12 |
| TC11000010.hg.1 | 15.84 | 9.68 | IFITM2 | interferon induced transmembrane protein 2 | Coding | -71.67 |
| TC01003638.hg.1 | 12.13 | 5.95 | PTGS2 | prostaglandin-endoperoxide synthase 2 (prostaglandin G/H synthase and cyclooxygenase) | Coding | -72.53 |
| TC07001582.hg.1 | 12.58 | 6.4 | STEAP4 | STEAP family member 4 | Coding | -72.63 |
| TC6_mcf_hap5000169.hg.1 | 13.72 | 7.53 | HLA-DRB4 | major histocompatibility complex, class II, DR beta 4 | Coding | -72.88 |
| TC05000159.hg.1 | 12.98 | 6.75 | IL7R | interleukin 7 receptor | Coding | -75.26 |
| TC6_apd_hap1000101.hg.1 | 16.04 | 9.78 | HLA-DRB1; HLA-DRB3 | major histocompatibility complex, class II, DR beta 1; major histocompatibility complex, class II, DR beta 3 | Coding | -76.65 |
| TC0X000171.hg.1 | 14.17 | 7.88 | CYBB | cytochrome b-245, beta polypeptide | Coding | -77.93 |
| TC19001458.hg.1 | 14.53 | 8.23 | TYROBP | TYRO protein tyrosine kinase binding protein | Coding | -78.66 |
| TC12000182.hg.1 | 13.73 | 7.32 | GPRC5A; MIR614 | G protein-**coupled receptor, class C, group 5, memb**er A; microRNA 614 | Coding | -84.99 |
| TC19000647.hg.1 | 13.87 | 7.45 | FOSB | FBJ murine osteosarcoma viral oncogene homolog B | Coding | -85.35 |
| TC11000467.hg.1 | 14.26 | 7.78 | SERPING1 | serpin peptidase inhibitor, clade G (C1 inhibitor), member 1 | Coding | -89.35 |
| TC10000415.hg.1 | 16.14 | 9.47 | SRGN | serglycin | Coding | -101.48 |
| TC6_mann_hap4000159.hg.1 | 14.33 | 7.63 | HLA-DRB4 | major histocompatibility complex, class II, DR beta 4 | Coding | -103.94 |
| TC05000187.hg.1 | 15.01 | 8.31 | C7 | complement component 7 | Coding | -104.03 |
| TC16000476.hg.1 | 14.26 | 7.51 | MT1X | metallothionein 1X | Coding | -107.19 |
| TC03000149.hg.1 | 14.03 | 7.28 | TGFBR2 | transforming growth factor beta receptor II | Coding | -107.59 |
| TC15000270.hg.1 | 15.31 | 8.49 | THBS1 | thrombospondin 1 | Coding | -113.07 |
| TC05002066.hg.1 | 13.36 | 6.51 | DUSP1 | dual specificity phosphatase 1 | Coding | -114.91 |
| TC16002074.hg.1 | 14.04 | 7.15 | MT1M | metallothionein 1M | Coding | -119.01 |
| TC01002441.hg.1 | 15.21 | 8.31 | LAPTM5 | lysosomal protein transmembrane 5 | Coding | -119.35 |
| TC19000174.hg.1 | 13.79 | 6.8 | ICAM1 | intercellular adhesion molecule 1 | Coding | -126.66 |
| TC02000281.hg.1 | 14.69 | 7.65 | EPAS1 | endothelial PAS domain protein 1 | Coding | -131.44 |
| TC04001410.hg.1 | 13.92 | 6.79 | ADH1B | alcohol dehydrogenase 1B (class I), beta polypeptide | Coding | -140.35 |
| TC06001027.hg.1 | 14.36 | 7.17 | TNFAIP3 | tumor necrosis factor, alpha-induced protein 3 | Coding | -146.89 |
| TC19000228.hg.1 | 12.61 | 5.39 | JUNB | jun B proto-oncogene | Coding | -148.98 |
| TC10001454.hg.1 | 16.38 | 9.04 | SFTPA2; SFTPA1 | surfactant protein A2; surfactant protein A1 | Coding | -161.94 |
| TC12001187.hg.1 | 17.1 | 9.75 | A2M | alpha-2-macroglobulin | Coding | -163.91 |
| TC02002046.hg.1 | 16.06 | 8.62 | SFTPB | surfactant protein B | Coding | -173.75 |
| TC10000569.hg.1 | 15.94 | 8.34 | SFTPA1 | surfactant protein A1 | Coding | -194.7 |
| TC12000189.hg.1 | 15.64 | 8.01 | EMP1 | epithelial membrane protein 1 | Coding | -198.11 |
| TC16002034.hg.1 | 16.24 | 8.38 | MT2A | metallothionein 2A | Coding | -232.32 |
| TC19001103.hg.1 | 15.12 | 7.19 | C3 | complement component 3 | Coding | -243.42 |
| TC12000309.hg.1 | 14.17 | 6.23 | LRRK2 | leucine-rich repeat kinase 2 | Coding | -245.02 |
| TC12000611.hg.1 | 17.81 | 9.66 | LYZ | lysozyme | Coding | -283.43 |
| TC05000701.hg.1 | 15.96 | 7.33 | EGR1 | early growth response 1 | Coding | -395.47 |
| TC20000876.hg.1 | 15.92 | 7.02 | SLPI | secretory leukocyte peptidase inhibitor | Coding | -478.08 |
| TC04001270.hg.1 | 17.36 | 8.29 | JCHAIN | joining chain of multimeric IgA and IgM | Coding | -539.9 |
| TC19000544.hg.1 | 17.22 | 5.96 | ZFP36 | ZFP36 ring finger protein | Coding | -2452.76 |

**Supplementary Table 5:** Differential expression of transcripts between LUAD versus LUSC with Fold change more than 10; P-val=<0.001 and FDR P-val=<0.001. We identified down-regulation of 6 transcripts and up-regulation of 57 transcripts in LUAD compared to LUSC.

| ID | LUAD Avg (log2) | LUSC Avg (log2) | Fold Change | Gene Symbol | Description | Group |
| --- | --- | --- | --- | --- | --- | --- |
| TC04000478.hg.1 | 17.76 | 8.45 | 634.32 | SPP1 | secreted phosphoprotein 1 | Coding |
| TC12000611.hg.1 | 16.24 | 9.66 | 95.87 | LYZ | Lysozyme | Coding |
| TC0X000171.hg.1 | 13.75 | 7.88 | 58.25 | CYBB | cytochrome b-245, beta polypeptide | Coding |
| TC01002441.hg.1 | 13.84 | 8.31 | 46.22 | LAPTM5 | lysosomal protein transmembrane 5 | Coding |
| TC09000149.hg.1 | 15.25 | 9.96 | 38.99 | ANXA2; ANXA2P2 | annexin A2; annexin A2 pseudogene 2 | Coding |
| TC11000332.hg.1 | 12.87 | 7.81 | 33.28 | CD44 | CD44 molecule (Indian blood group) | Coding |
| TC6_cox_hap2000090.hg.1 | 16.32 | 11.32 | 32.15 | HLA-DRA | major histocompatibility complex, class II, DR alpha | Coding |
| TC01003210.hg.1 | 13.53 | 8.55 | 31.67 | CTSS | cathepsin S | Coding |
| TC6_mcf_hap5000075.hg.1 | 16.47 | 11.48 | 31.62 | HLA-DRA | major histocompatibility complex, class II, DR alpha | Coding |
| TC6_qbl_hap6000081.hg.1 | 16.47 | 11.48 | 31.62 | HLA-DRA | major histocompatibility complex, class II, DR alpha | Coding |
| TC6_ssto_hap7000076.hg.1 | 16.47 | 11.48 | 31.62 | HLA-DRA | major histocompatibility complex, class II, DR alpha | Coding |
| TC06000399.hg.1 | 16.32 | 11.36 | 30.92 | HLA-DRA | major histocompatibility complex, class II, DR alpha | Coding |
| TC15001505.hg.1 | 13.28 | 8.33 | 30.86 | ANXA2 | annexin A2 | Coding |
| TC6_mann_hap4000074.hg.1 | 16.46 | 11.52 | 30.76 | HLA-DRA | major histocompatibility complex, class II, DR alpha | Coding |
| TC6_dbb_hap3000083.hg.1 | 16.41 | 11.47 | 30.74 | HLA-DRA | major histocompatibility complex, class II, DR alpha | Coding |
| TC09000335.hg.1 | 12.99 | 8.07 | 30.29 | ANXA1 | annexin A1 | Coding |
| TC10000145.hg.1 | 12.55 | 7.69 | 28.9 | PLXDC2 | plexin domain containing 2 | Coding |
| TC10000415.hg.1 | 14.3 | 9.47 | 28.52 | SRGN | serglycin | Coding |
| TC6_cox_hap2000193.hg.1 | 13.88 | 9.05 | 28.5 | HLA-DRB1; HLA-DRB3 | major histocompatibility complex, class II, DR beta 1; major histocompatibility complex, class II, DR beta 3 | Coding |
| TC6_apd_hap1000101.hg.1 | 14.61 | 9.78 | 28.45 | HLA-DRB1; HLA-DRB3 | major histocompatibility complex, class II, DR beta 1; major histocompatibility complex, class II, DR beta 3 | Coding |
| TC6_qbl_hap6000182.hg.1 | 13.61 | 8.92 | 25.93 | HLA-DRB1; HLA-DRB3 | major histocompatibility complex, class II, DR beta 1; major histocompatibility complex, class II, DR beta 3 | Coding |
| TC18000047.hg.1 | 13.67 | 9.03 | 24.97 | RAB31 | RAB31, member RAS oncogene family | Coding |
| TC12001187.hg.1 | 14.37 | 9.75 | 24.69 | A2M | alpha-2-macroglobulin | Coding |
| TC19001103.hg.1 | 11.61 | 7.19 | 21.44 | C3 | complement component 3 | Coding |
| TC6_ssto_hap7000163.hg.1 | 12.81 | 8.59 | 18.59 | HLA-DRB1; HLA-DRB4 | major histocompatibility complex, class II, DR beta 1; major histocompatibility complex, class II, DR beta 4 | Coding |
| TC20000821.hg.1 | 12.62 | 8.4 | 18.56 | SAMHD1 | SAM domain and HD domain 1 | Coding |
| TC12001162.hg.1 | 11.88 | 7.71 | 17.95 | CD163 | CD163 molecule | Coding |
| TC01001382.hg.1 | 11.59 | 7.52 | 16.81 | FCER1G | Fc fragment of IgE, high affinity I, receptor for; gamma polypeptide | Coding |
| TC01002847.hg.1 | 11.51 | 7.52 | 15.89 | GBP1 | guanylate binding protein 1, interferon-inducible | Coding |
| TC03001651.hg.1 | 11.29 | 7.34 | 15.54 | CCDC80 | coiled-coil domain containing 80 | Coding |
| TC6_cox_hap2000036.hg.1 | 12.39 | 8.46 | 15.27 | HLA-E | major histocompatibility complex, class I, E | Coding |
| TC6_dbb_hap3000029.hg.1 | 12.39 | 8.46 | 15.27 | HLA-E | major histocompatibility complex, class I, E | Coding |
| TC6_qbl_hap6000029.hg.1 | 12.39 | 8.46 | 15.27 | HLA-E | major histocompatibility complex, class I, E | Coding |
| TC6_ssto_hap7000029.hg.1 | 12.39 | 8.46 | 15.27 | HLA-E | major histocompatibility complex, class I, E | Coding |
| TC12001278.hg.1 | 11.53 | 7.61 | 15.08 | ARHGDIB | Rho GDP dissociation inhibitor (GDI) beta | Coding |
| TC11000010.hg.1 | 13.53 | 9.68 | 14.45 | IFITM2 | interferon induced transmembrane protein 2 | Coding |
| TC01000968.hg.1 | 10.9 | 7.06 | 14.28 | CD53 | CD53 molecule | Coding |
| TC01006339.hg.1 | 10.7 | 6.94 | 13.53 | FCGR2C | Fc fragment of IgG, low affinity IIc, receptor for (CD32) (gene/pseudogene) | Coding |
| TC05001936.hg.1 | 13.67 | 9.91 | 13.5 | CD74 | CD74 molecule, major histocompatibility complex, class II invariant chain | Coding |
| TC02002905.hg.1 | 11.64 | 7.89 | 13.49 | COL6A3 | collagen, type VI, alpha 3 | Coding |
| TC09001547.hg.1 | 12.67 | 8.95 | 13.12 | STOM | stomatin | Coding |
| TC17000103.hg.1 | 13.09 | 9.38 | 13.09 | CD68 | CD68 molecule | Coding |
| TC06000338.hg.1 | 12.39 | 8.72 | 12.71 | HLA-E | major histocompatibility complex, class I, E | Coding |
| TC6_mann_hap4000031.hg.1 | 12.39 | 8.72 | 12.71 | HLA-E | major histocompatibility complex, class I, E | Coding |
| TC6_mcf_hap5000023.hg.1 | 12.39 | 8.72 | 12.71 | HLA-E | major histocompatibility complex, class I, E | Coding |
| TC02001105.hg.1 | 12.61 | 9.07 | 11.64 | COL3A1; MIR3606 | collagen, type III, alpha 1; microRNA 3606 | Coding |
| TC16001165.hg.1 | 11.38 | 7.86 | 11.52 | CDH11 | cadherin 11, type 2, OB-cadherin (osteoblast) | Coding |
| TC01006361.hg.1 | 10.28 | 6.79 | 11.25 | GBP2 | guanylate binding protein 2, interferon-inducible | Coding |
| TC12000793.hg.1 | 10.65 | 7.18 | 11.09 | DRAM1 | DNA-damage regulated autophagy modulator 1 | Coding |
| TC14000133.hg.1 | 10.33 | 6.87 | 11 | MMP14 | matrix metallopeptidase 14 (membrane-inserted) | Coding |
| TC13000642.hg.1 | 10.93 | 7.48 | 10.95 | LCP1 | lymphocyte cytosolic protein 1 (L-plastin) | Coding |
| TC11001230.hg.1 | 13.92 | 10.51 | 10.68 | IFITM3 | interferon induced transmembrane protein 3 | Coding |
| TC12000521.hg.1 | 11.1 | 7.68 | 10.66 | LRP1 | LDL receptor related protein 1 | Coding |
| TC6_cox_hap2000202.hg.1 | 11.38 | 8.01 | 10.39 | HLA-DPA1 | major histocompatibility complex, class II, DP alpha 1 | Coding |
| TC6_mcf_hap5000194.hg.1 | 11.8 | 8.44 | 10.25 | HLA-C; HLA-B | major histocompatibility complex, class I, C; major histocompatibility complex, class I, B | Coding |
| TC12000642.hg.1 | 10.67 | 7.32 | 10.15 | GLIPR1 | GLI pathogenesis-related 1 | Coding |
| TC02000398.hg.1 | 9.48 | 6.15 | 10.03 | PLEK | pleckstrin | Coding |
| TC07001143.hg.1 | 7.42 | 10.84 | -10.75 | ICA1 | islet cell autoantigen 1 | Coding |
| TC08000650.hg.1 | 5.45 | 9.27 | -14.14 | RIMS2 | regulating synaptic membrane exocytosis 2 | Coding |
| TC01001753.hg.1 | 5.48 | 9.37 | -14.89 | SYT14 | synaptotagmin XIV | Coding |
| TC08000476.hg.1 | 5.85 | 10.39 | -23.25 | KCNB2 | potassium channel, voltage gated Shab related subfamily B, member 2 | Coding |
| TC03000620.hg.1 | 5.52 | 10.34 | -28.11 | STXBP5L | syntaxin binding protein 5-like | Coding |
| TC15000409.hg.1 | 5.7 | 11.44 | -53.43 | SCG3 | secretogranin III | Coding |
